# Supplementary material
Source: HighWire-hosted journal article supplement (http://www.ajnr.org/highwire/filestream/52630/field_highwire_adjunct_files/0/14-00863.pdf)
Supplement: 14-00863.pdf [file 14-00863.pdf]

**On-line Table: Stepwise model construction for the 7-variable predictive model**

| Variable                   | Entry into the Model | Cumulative Model ( $R^2$ ) | Individual Variable ( $P$ value) | Cumulative AIFR-Positive Cases Correctly Identified | Cumulative AIFR-Positive Cases Missed | Cumulative Control Cases Correctly Identified (Excluded) | Cumulative Control Cases Considered AIFR-Positive | Cumulative Model (Sensitivity) (%) | Cumulative Model (Specificity) (%) | Cumulative Model (PPV) (%) | Cumulative Model (NPV) (%) |
|----------------------------|----------------------|----------------------------|----------------------------------|-----------------------------------------------------|---------------------------------------|----------------------------------------------------------|---------------------------------------------------|------------------------------------|------------------------------------|----------------------------|----------------------------|
| Ant or post periantral fat | 1                    | 0.461                      | <.001                            | 31                                                  | 11                                    | 39                                                       | 3                                                 | 73.8                               | 92.9                               | 91.2                       | 78.0                       |
| Pterygopalatine fossa      | 2                    | 0.545                      | <.001                            | 37                                                  | 5                                     | 36                                                       | 6                                                 | 88.1                               | 85.7                               | 86.0                       | 87.8                       |
| Nasolacrimal duct          | 3                    | 0.582                      | .003                             | 38                                                  | 4                                     | 36                                                       | 6                                                 | 90.5                               | 85.7                               | 86.4                       | 90.0                       |
| Lacrimal sac               | 4                    | 0.582                      | .700                             | 38                                                  | 4                                     | 36                                                       | 6                                                 | 90.5                               | 85.7                               | 86.4                       | 90.0                       |
| Orbit                      | 5                    | 0.582                      | .024                             | 38                                                  | 4                                     | 36                                                       | 6                                                 | 90.5                               | 85.7                               | 86.4                       | 90.0                       |
| Septal ulceration          | 6                    | 0.621                      | .004                             | 39                                                  | 3                                     | 36                                                       | 6                                                 | 92.9                               | 85.7                               | 86.7                       | 92.3                       |
| Bone dehiscence            | 7                    | 0.661                      | .003                             | 40                                                  | 2                                     | 36                                                       | 6                                                 | 95.2                               | 85.7                               | 87.0                       | 94.7                       |

**Note:**—Ant indicates anterior; post, posterior.
